# Supplementary material for: Multimodal Prehabilitation in Heart Transplant Recipients Improves Short-Term Post-Transplant Outcomes without Increasing Costs
Source: MDPI journal article supplement (doi:10.3390/jcm12113724), 2023-05-28
Supplement: s1 [file s1]

Supplementary material

Table S1. Baseline characteristics from the baseline assessment performed on 46 patients that initially consented to participate (extended group).

|                                                   | Prehab<br>Baseline assessment<br>(N=46) |
|---------------------------------------------------|-----------------------------------------|
| Age (years)                                       | 54 ± 14                                 |
| Male                                              | 30 (80)                                 |
| Transplantation type= Re-transplantation          | 2 (4.3)                                 |
| Smoker Status                                     |                                         |
| Former Smoker                                     | 43 (93.4)                               |
| End-Stage Heart Failure Etiology                  |                                         |
| Ischemic cardiomyopathy                           | 19 (41.3)                               |
| Dilated cardiomyopathy                            | 12 (26.1)                               |
| Hypertrophic cardiomyopathy                       | 6 (13)                                  |
| Amyloid cardiomyopathy                            | 2 (4.3)                                 |
| Others                                            | 6 (13)                                  |
| Time in heart transplantation waiting list (days) | 247 (21 - 735)                          |
| Charlson Comorbidity Index                        | 4 (1 - 9)                               |
| CFS-CSHA                                          | 4 (4 - 5)                               |
| Frailty (CFS-CSHA ≥5)                             | 16 (40)                                 |
| Arterial hypertension                             | 20 (43.4)                               |
| Dyslipidemia                                      | 20 (43.4)                               |
| Diabetes Mellitus                                 | 14 (30.4)                               |
| Arterial peripheral disease                       | 7 (15.2)                                |
| Ischemic heart disease                            | 20 (43.4)                               |
| Hypothyroidism                                    | 5 (10.8)                                |
| Obstructive sleep apnea                           | 5 (10.8)                                |
| Stroke                                            | 7 (15.2)                                |
| COPD/Asthma                                       | 10 (21.7)                               |
| Chronic kidney disease                            | 18 (39.1)                               |
| Obesity (IMC >30) n (%)                           | 9 (19.5)                                |
| Previous cardiac surgery                          | 14 (30.4)                               |
| Levosimendan                                      | 17 (36)                                 |
| Pulmonary hypertension                            |                                         |
| No                                                | 12 (26)                                 |
| Mild                                              | 8 (17.4)                                |
| Moderate                                          | 11 (23.9)                               |
| Severe                                            | 14 (30.4)                               |
| Pulmonary hypertension treatment                  | 15 (32.6)                               |
| Bosentan                                          | 12 (26.1)                               |
| Sildenafil                                        | 8 (17.4)                                |
| Left ventricle ejection fraction %                | 21 (12 - 65)                            |
| Arrhythmia history                                |                                         |
| No previous arrhythmia history                    | 14 (30.4)                               |
| Atrial fibrillation                               | 25 (54.3)                               |
| Auriculoventricular block                         | 2 (4.3)                                 |
| Other arrhythmias                                 | 11 (23.9)                               |

---

|                                               |           |
|-----------------------------------------------|-----------|
| <b>Pacemaker</b>                              | 5 (16.1)  |
| <b>Implantable cardioverter-defibrillator</b> | 35 (76.1) |
| <b>INTERMACS (last month previous to HT)</b>  |           |
| <b>3</b>                                      | 2 (4.3)   |
| <b>4</b>                                      | 14 (30.4) |
| <b>5</b>                                      | 14 (30.4) |
| <b>6</b>                                      | 6 (13)    |
| <b>7</b>                                      | 7 (15.2)  |

---

Data are presented as means  $\pm$  SDs, N (%), and medians (Q1–Q3) appropriately. Abbreviations: NYHA, New York Heart Association; INTERMACS, Interagency Registry for Mechanically Assisted Circulatory Support; COPD, Chronic obstructive pulmonary disease.
